# Supplementary material for: 89Zr-Immuno-PET with Immune Checkpoint Inhibitors: Measuring Target Engagement in Healthy Organs
Source: MDPI journal article supplement (doi:10.3390/cancers15235546), 2023-11-23
Supplement: s1 [file s1]

# Supplementary Materials

**Table S1.** RNA sequencing data expressed as normalised tags per million (nTPM) for the five different [<sup>89</sup>Zr]Zr-mAbs and four different tissues obtained from the Human Protein Atlas [Uhlen et al., 2010].

| <sup>89</sup> Zr-Immuno-PET Tracer  | Target | Spleen | Bone Marrow | Kidneys | Brain   |
|-------------------------------------|--------|--------|-------------|---------|---------|
| [ <sup>89</sup> Zr]Zr-BI 754111     | LAG-3  | 23.6   | 1.5         | 1.0     | 0.2–0.7 |
| [ <sup>89</sup> Zr]Zr-durvalumab    | PD-L1  | 10.2   | 1.9         | 2.6     | 0.6–1.9 |
| [ <sup>89</sup> Zr]Zr-nivolumab     | PD-1   | 7.0    | 0.9         | 0.7     | 0.0–0.4 |
| [ <sup>89</sup> Zr]Zr-pembrolizumab | PD-1   | 7.0    | 0.9         | 0.7     | 0.0–0.4 |
| [ <sup>89</sup> Zr]Zr-ipilimumab    | CTLA-4 | 3.9    | 6.1         | 0.6     | 0.4–1.3 |

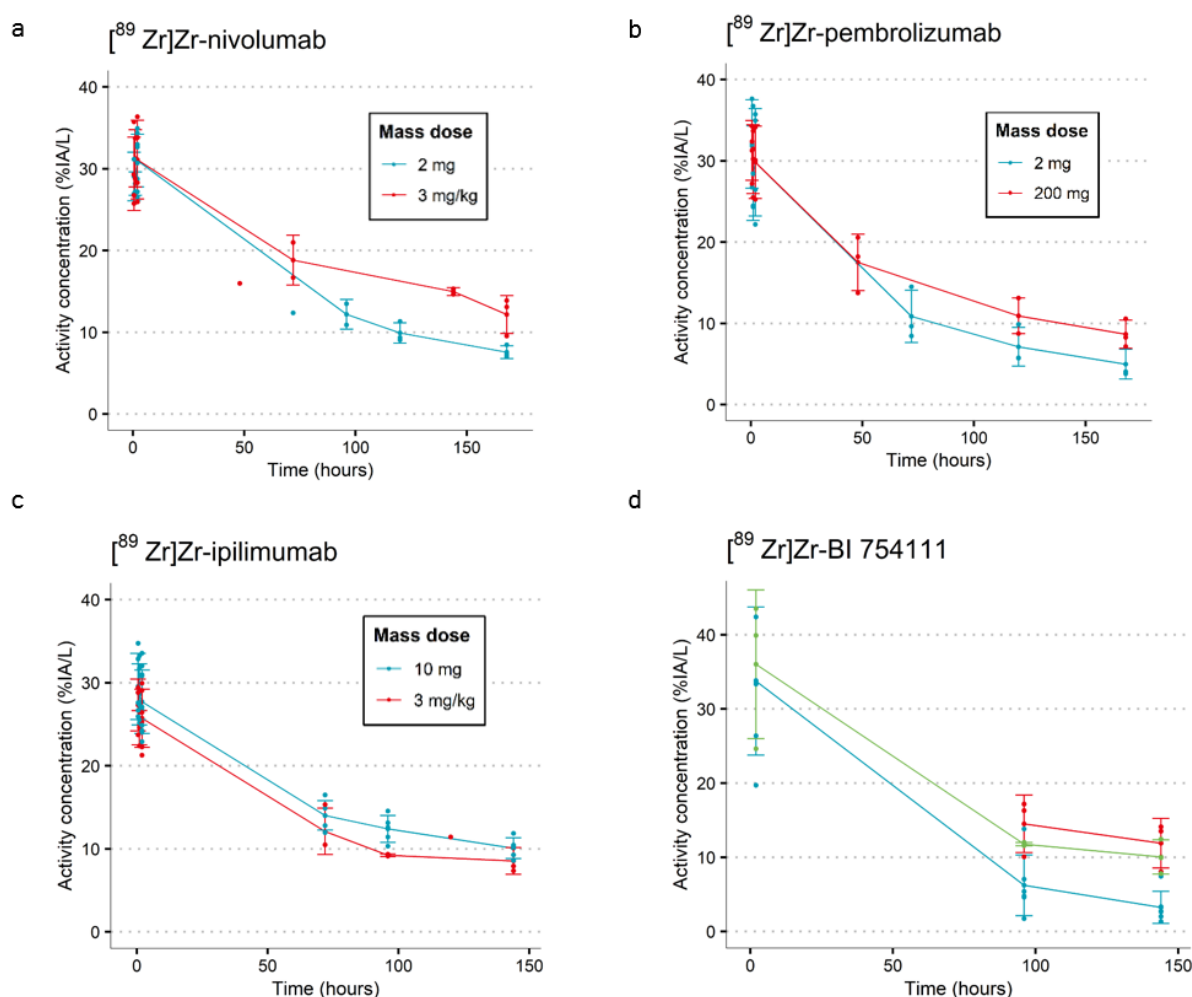

**Figure S1.** Plasma activity concentrations over time for two or three doses of [<sup>89</sup>Zr]Zr-nivolumab (a), [<sup>89</sup>Zr]Zr-pembrolizumab (b), [<sup>89</sup>Zr]Zr-ipilimumab (c) and [<sup>89</sup>Zr]Zr-BI 754111 (d). For time points with 2 or more observations a mean %IA/L with SD is shown. Every dot represents one observation.

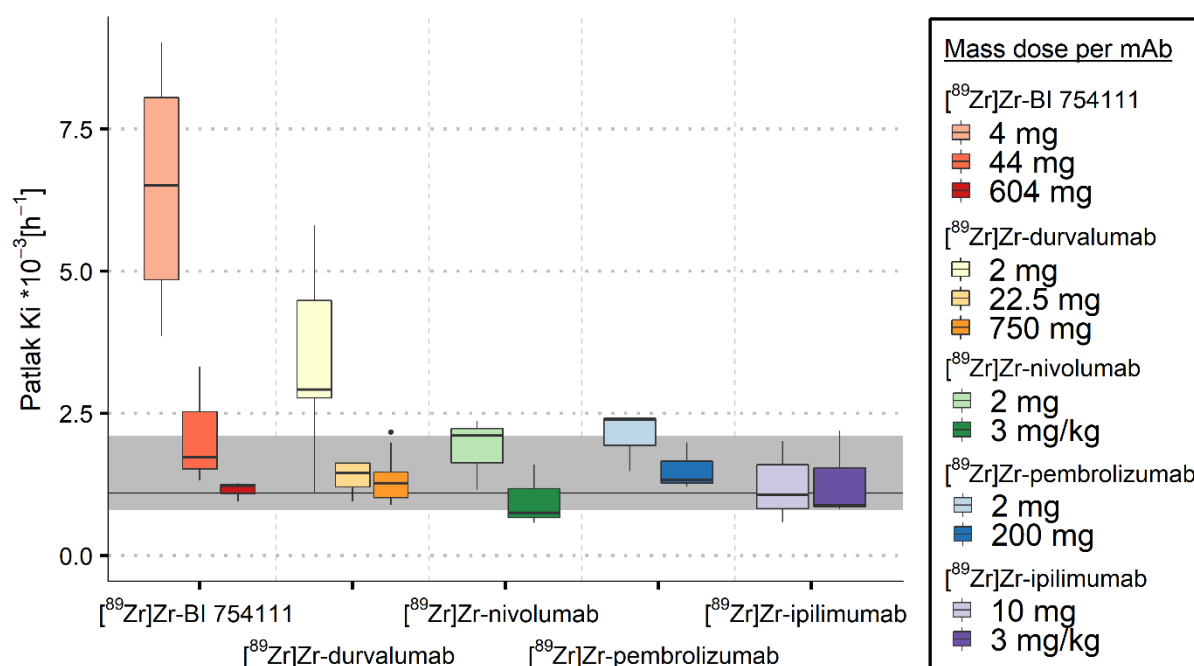

**Figure S2.** Irreversible uptake in liver quantified with  $K_i$  values as a function of mass dose for the five  $[^{89}\text{Zr}]\text{Zr-mAbs}$  investigated. Ns-baseline  $K_i$  median values and interquartile range for liver are indicated by the black line and grey area, respectively.  $K_i$  values decreased with increasing mass dose for all  $[^{89}\text{Zr}]\text{Zr-mAbs}$ , except for  $[^{89}\text{Zr}]\text{Zr-ipilimumab}$ .  $K_i$  values were comparable to ns-baseline values for all mass doses, except for the low mass doses of  $[^{89}\text{Zr}]\text{Zr-BI 754111}$  and  $[^{89}\text{Zr}]\text{Zr-durvalumab}$ .

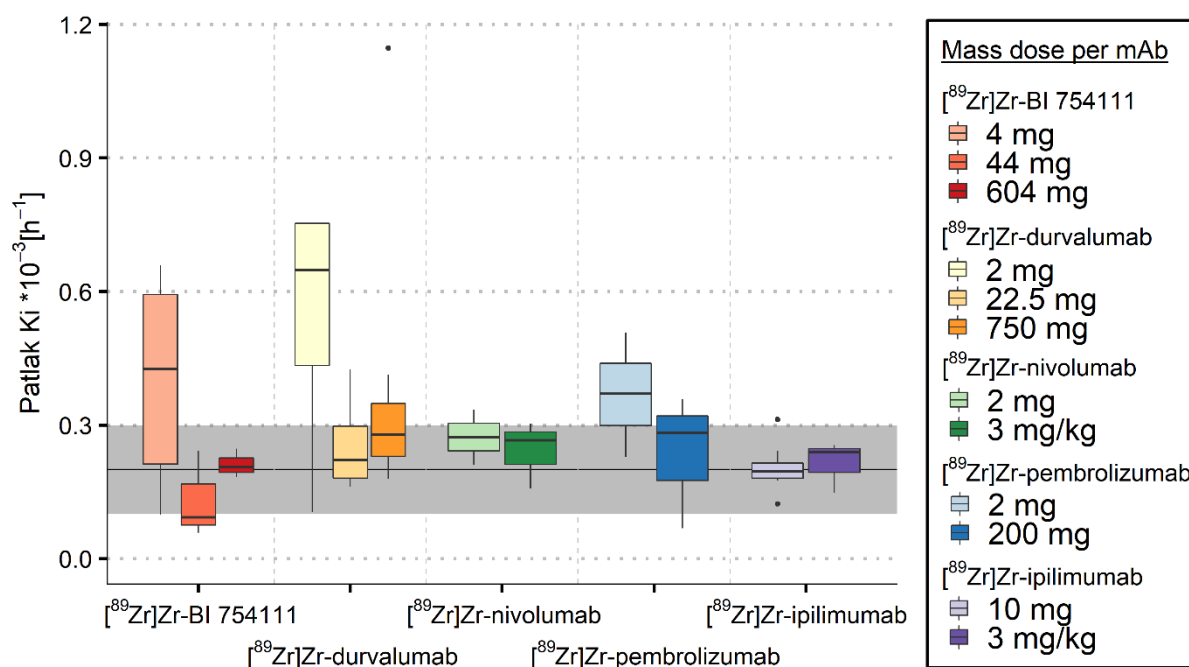

**Figure S3.** Irreversible uptake in lungs quantified with  $K_i$  values as a function of mass dose for the five  $[^{89}\text{Zr}]\text{Zr-mAbs}$  investigated. Median ns-baseline  $K_i$  values and interquartile range for lungs are indicated by the black line and grey area, respectively.  $K_i$  values decreased with increasing mass dose for three of five  $[^{89}\text{Zr}]\text{Zr-mAbs}$ .  $K_i$  values were comparable to ns-baseline values for all mass doses, except for the low mass doses of  $[^{89}\text{Zr}]\text{Zr-BI 754111}$ ,  $[^{89}\text{Zr}]\text{Zr-durvalumab}$  and  $[^{89}\text{Zr}]\text{Zr-pembrolizumab}$ .
